# Supplementary material for: Adiponectin and Sarcopenia: A Systematic Review With Meta-Analysis
Source: PubMed Central journal article supplement (PMC8082154; doi:10.3389/fendo.2021.576619), 2021-04-15
Supplement: DataSheet_1.pdf [file DataSheet_1.pdf]

| ID | DOI or PMID                                | Only_Abstract/<br>Title | _Fulltext |
|----|--------------------------------------------|-------------------------|-----------|
| 1  | 10.1007/s00330-018-5973-2                  |                         | √         |
| 2  | 5970-7. doi: 10.1210/jc.2005-0261.         | √                       |           |
| 3  | 10.1016/j.mce.2016.02.001                  | √                       |           |
| 4  | 10.1016/j.cell.2012.10.050                 | √                       |           |
| 5  | 10.1016/j.exger.2013.04.008                | √                       |           |
| 6  | 10.1016/j.obmed.2017.09.005                | √                       |           |
| 7  | 10.1016/j.eurger.2017.07.010               | √                       |           |
| 8  | 0.1016/j.jacc.2008.12.040                  | √                       |           |
| 9  | 10.1111/j.1365-2796.2006.01663.x           | √                       |           |
| 10 | 10.1016/j.bbamcr.2016.01.016               | √                       |           |
| 11 | 10.1016/j.bbadis.2015.10.029               | √                       |           |
| 12 | PMID: 23732375                             | √                       |           |
| 13 | 10.1053/j.jrn.2008.02.001                  | √                       |           |
| 14 | 10.1016/j.transproceed.2014.09.014         | √                       |           |
| 15 | 10.1016/S1665-2681(19)31790-9              | √                       |           |
| 16 | 10.1016/j.bbmt.2017.11.024                 | √                       |           |
| 17 | 10.1253/circj.cj-08-0961                   | √                       |           |
| 18 | 10.1016/S1474-4422(14)70085-7              | √                       |           |
| 19 | 10.1016/j.cardiores.2007.02.010            | √                       |           |
| 20 | 10.1016/j.bone.2010.08.010                 |                         | √         |
| 21 | 10.1016/j.numecd.2008.07.002               | √                       |           |
| 22 | 10.1086/680862                             | √                       |           |
| 23 | 10.1007/s00223-010-9376-x                  |                         | √         |
| 24 | 10.1016/j.ijcard.2011.06.061               | √                       |           |
| 25 | 10.3109/00365513.2012.687759               | √                       |           |
| 26 | 10.1210/en.2012-1765                       | √                       |           |
| 27 | 10.1016/j.jstrokecerebrovasdis.2016.10.045 | √                       |           |
| 28 | 10.1038/nutd.2012.18                       | √                       |           |
| 29 | 10.1016/j.numecd.2011.03.012               | √                       |           |
| 30 | 0.1016/B978-0-12-398313-8.00011-7          | √                       |           |
| 31 | 10.1111/j.1463-1326.2012.01626.x           | √                       |           |
| 32 | 10.1161/ATVBAHA.110.216804                 | √                       |           |
| 33 | 10.1074/jbc.M501149200                     | √                       |           |
| 34 | 10.1210/me.2013-1401                       | √                       |           |
| 35 | 10.1016/j.rmed.2013.08.016                 | √                       |           |
| 36 | 10.1016/j.atherosclerosis.2011.11.038      | √                       |           |
| 37 | 10.2337/diacare.27.3.739                   | √                       |           |
| 38 | 10.1152/ajpcell.00030.2008                 | √                       |           |
| 39 | 10.1038/oby.2010.296                       | √                       |           |
| 40 | 10.1016/j.yjmcc.2015.06.020                | √                       |           |
| 41 | 10.1161/HYPERTENSIONAHA.106.079509         | √                       |           |

|    |                                       |   |   |
|----|---------------------------------------|---|---|
| 42 | 10.1016/j.trsl.2006.12.008            | √ |   |
| 43 | 10.1038/sj.ijo.0802387                | √ |   |
| 44 | 10.1016/j.orcp.2006.10.002            | √ |   |
| 45 | 10.2353/ajpath.2010.100363            | √ |   |
| 46 | 10.1016/j.mehy.2011.04.008            | √ |   |
| 47 | 10.1016/j.ygyno.2015.02.012           | √ |   |
| 48 | 10.1016/j.cmet.2013.04.005            | √ |   |
| 49 | 10.1038/oby.2008.487                  | √ |   |
| 50 | 10.1016/j.cyto.2016.12.018            | √ |   |
| 51 | 10.1038/s41598-018-37115-3            | √ |   |
| 52 | 10.1016/j.genrep.2018.11.006          | √ |   |
| 53 | 10.1002/cphy.c170046                  | √ |   |
| 54 | 10.3109/17477160903111748             | √ |   |
| 55 | 10.1002/jcsm.12086                    | √ |   |
| 56 | 10.1128/MCB.02279-06                  | √ |   |
| 57 | 10.1016/j.ccn.2005.07.011             | √ |   |
| 58 | 10.1016/j.cmet.2007.06.003            | √ |   |
| 59 | 10.2337/db07-0690                     | √ |   |
| 60 | 10.1111/j.1463-1326.2005.00510.x      | √ |   |
| 61 | 10.3390/ijms18061321                  | √ |   |
| 62 | 10.1016/j.atherosclerosis.2019.10.021 | √ |   |
| 63 | 10.1016/j.metabol.2014.06.011         | √ |   |
| 64 | 10.1002/cncr.21690                    | √ |   |
| 65 | 10.1111/j.1365-2265.2008.03242.x      | √ |   |
| 66 | 10.1016/j.atherosclerosis.2012.09.015 | √ |   |
| 67 | 10.1016/j.cyto.2016.06.028            | √ |   |
| 68 | 10.1016/j.diabet.2013.11.004          | √ |   |
| 69 | 10.1016/j.diabet.2007.08.002          | √ |   |
| 70 | 10.1007/BF03401534                    | √ |   |
| 71 | 10.1002/ajhb.21087                    | √ |   |
| 72 | 10.1053/j.jrn.2004.09.034             | √ |   |
| 73 | 10.1093/gerona/glp155                 |   | √ |
| 74 | 10.1016/j.exger.2017.10.014           | √ |   |
| 75 | 10.1016/s1534-5807(02)00199-5         | √ |   |
| 76 | 10.1016/j.cyto.2012.10.023            | √ |   |
| 77 | 10.1016/j.coemr.2019.02.003           | √ |   |
| 78 | 10.1016/j.mad.2013.11.008             | √ |   |
| 79 | 10.1016/j.metabol.2010.10.005         | √ |   |
| 80 | 10.1152/ajpendo.00116.2005            | √ |   |
| 81 | 10.1016/j.ejphar.2008.02.048          | √ |   |
| 82 | PMID: 16437024.                       | √ |   |
| 83 | 10.1016/j.bbrc.2013.03.030            | √ |   |
| 84 | 10.1016/j.gtc.2018.07.016             | √ |   |

|     |                                  |   |   |
|-----|----------------------------------|---|---|
| 85  | 10.1111/j.1872-034X.2011.00833.x | √ |   |
| 86  | 10.1016/j.mad.2019.03.003        | √ |   |
| 87  | 10.1016/j.exger.2012.04.005      | √ |   |
| 88  | 10.1016/j.mce.2007.07.005        | √ |   |
| 89  | 10.1016/S2213-8587(14)70034-8    | √ |   |
| 90  | 10.1016/j.arr.2016.04.003        | √ |   |
| 91  | 10.1016/j.exger.2008.02.008      | √ |   |
| 92  | 10.2337/db09-0591                | √ |   |
| 93  | 10.1371/journal.pone.0186811     | √ |   |
| 94  | 10.1016/j.exger.2016.02.013      | √ |   |
| 95  | 10.1681/ASN.2013091025           | √ |   |
| 96  | 10.1016/j.bbalip.2018.02.006     | √ |   |
| 97  | 10.1016/j.arr.2019.100935        | √ |   |
| 98  | 10.1016/j.cmet.2012.01.004       | √ |   |
| 99  | 10.1016/j.metabol.2004.09.012    |   | √ |
| 100 | 10.1530/JOE-13-0625              | √ |   |
| 101 | 10.1002/dmrr.321                 | √ |   |
| 102 | 10.1016/j.jcm.2014.07.002        | √ |   |
| 103 | 10.1016/j.metabol.2012.05.018    | √ |   |
| 104 | 10.1152/ajpendo.00430.2006       | √ |   |
| 105 | 10.1016/j.exger.2019.110787      | √ |   |
| 106 | 10.1016/j.eururo.2008.10.008     | √ |   |
| 107 | 10.1007/s00125-019-4887-0        | √ |   |
| 108 | 10.1016/j.maturitas.2016.06.008  | √ |   |
| 109 | 10.1016/j.cger.2015.04.012       | √ |   |
| 110 | 10.1016/j.jamda.2017.05.001      | √ |   |
| 111 | 10.1016/j.molcel.2014.03.005     | √ |   |
| 112 | 10.1016/j.arr.2016.08.004        | √ |   |
| 113 | 10.1002/jcsm.12284               | √ |   |
| 114 | 10.1016/j.pcad.2009.06.004       | √ |   |
| 115 | 10.1155/2013/601838              | √ |   |
| 116 | 10.1371/journal.pone.0134648     | √ |   |
| 117 | 10.1136/bmjdr-2017-000498        | √ |   |
| 118 | 10.1016/j.hrtlng.2015.08.006     | √ |   |
| 119 | 10.2337/db07-1556                | √ |   |
| 120 | 10.1007/s00394-012-0466-6        | √ |   |
| 121 | 10.1017/jns.2012.12              | √ |   |
| 122 | 10.1016/j.cvsm.2011.03.003       | √ |   |
| 123 | 10.1016/j.ahj.2011.02.014        | √ |   |
| 124 | 10.1016/j.jsams.2012.03.007      | √ |   |
| 125 | 10.26402/jpp.2020.1.02           | √ |   |
| 126 | 10.1016/j.jdiacomp.2015.11.004   | √ |   |
| 127 | 10.1016/j.anai.2012.07.017       | √ |   |

|     |                                       |   |   |
|-----|---------------------------------------|---|---|
| 128 | 10.1007/s00404-015-3656-7             | √ |   |
| 129 | 10.4082/kjfm.2017.38.1.8              | √ |   |
| 130 | 10.1016/j.numecd.2016.02.011          | √ |   |
| 131 | 10.1016/S1607-551X(09)70050-6         | √ |   |
| 132 | 10.1016/j.joca.2014.11.020            | √ |   |
| 133 | 10.1016/j.atherosclerosis.2006.11.017 | √ |   |
| 134 | 10.1016/j.tmsr.2018.09.002            | √ |   |
| 135 | 10.2337/diabetes.51.7.2325            | √ |   |
| 136 | 10.1053/j.ajkd.2015.02.325            |   | √ |
| 137 | 10.1016/j.ejim.2013.09.011            |   | √ |
| 138 | 10.1016/j.arcmed.2017.01.003          | √ |   |
| 139 | j.atherosclerosis.2008.08.019         | √ |   |
| 140 | 0.1016/j.diabet.2017.07.001           | √ |   |
| 141 | 10.1016/j.atherosclerosis.2014.02.033 | √ |   |
| 142 | 10.1186/1475-2840-10-67.              | √ |   |
| 143 | j.atherosclerosis.2009.12.007         | √ |   |
| 144 | 10.1016/j.cyto.2005.07.008            | √ |   |
| 145 | 10.1371/journal.pone.0201499          | √ |   |
| 146 | 10.1371/journal.pone.0225008          | √ |   |
| 147 | 10.1007/s00198-018-4428-6             | √ |   |
| 148 | 10.1016/j.jpainsymman.2009.09.021     | √ |   |
| 149 | 10.3109/15412555.2011.619599          | √ |   |
| 150 | 10.1159/000328780                     | √ |   |
| 151 | 10.1371/journal.pone.0198969          |   | √ |
| 152 | 10.1111/age.12155                     | √ |   |
| 153 | 10.1016/j.orcp.2018.08.002            |   | √ |
| 154 | 10.3747/pdi.2017.00177                | √ |   |
| 155 | 10.1016/j.annepidem.2012.07.011       | √ |   |
| 156 | 10.1016/j.numecd.2010.07.010          | √ |   |
| 157 | 10.1016/j.orcp.2015.11.008            | √ |   |
| 158 | 10.1016/j.bone.2011.04.023            | √ |   |
| 159 | 10.1080/15548627.2019.1628537         | √ |   |
| 160 | 10.1152/ajpheart.00626.2011           | √ |   |
| 161 | 10.1016/j.exger.2018.10.006           |   | √ |
| 162 | 10.1152/ajpendo.00002.2006            | √ |   |
| 163 | 10.1186/s12891-017-1477-5             | √ |   |
| 164 | 10.1016/j.tifs.2019.03.006            | √ |   |
| 165 | 10.1016/j.ijcard.2010.04.039          | √ |   |
| 166 | 10.1016/j.ghir.2009.09.002            | √ |   |
| 167 | 10.2174/13816128113196660697          | √ |   |
| 168 | 10.1016/j.cca.2017.07.014             | √ |   |
| 169 | 10.1016/j.exger.2019.110750           | √ |   |
| 170 | 10.1016/j.mad.2018.04.003             | √ |   |

|     |                                  |   |   |
|-----|----------------------------------|---|---|
| 171 | 10.1097/GME.0000000000001391     | √ |   |
| 172 | 10.1016/j.nefro.2017.04.001      |   | √ |
| 173 | 10.1016/j.jns.2017.08.3250       |   | √ |
| 174 | 10.1210/jc.2011-3123             | √ |   |
| 175 | 10.1002/jcb.23098                | √ |   |
| 176 | 10.1530/eje.1.02267              | √ |   |
| 177 | 10.1016/j.jdiacomp.2018.08.001   | √ |   |
| 178 | 10.1093/ndt/gfn053               | √ |   |
| 179 | 10.1016/j.numecd.2014.06.013     | √ |   |
| 180 | 10.1016/S2213-8587(13)70183-9    | √ |   |
| 181 | 10.1016/j.jsams.2010.10.587      | √ |   |
| 182 | 10.1038/sj.ijo.0803716           | √ |   |
| 183 | 10.1016/j.cmet.2010.08.016       | √ |   |
| 184 | 10.1002/mnfr.201000176           | √ |   |
| 185 | 10.1016/j.jbspin.2015.04.010     | √ |   |
| 186 | 10.1007/s13539-011-0020-z        | √ |   |
| 187 | 10.1016/j.eurger.2015.06.004     |   | √ |
| 188 | 10.1016/j.cmet.2015.08.022       | √ |   |
| 189 | 10.1016/j.mam.2011.07.001        | √ |   |
| 190 | 10.1016/j.exger.2013.10.014      | √ |   |
| 191 | 10.1016/j.mad.2018.10.005        | √ |   |
| 192 | 10.1016/j.arr.2009.10.003        | √ |   |
| 193 | 10.1016/j.febslet.2011.03.015    | √ |   |
| 194 | 10.1016/j.arr.2020.101038        | √ |   |
| 195 | 10.1016/j.arr.2016.08.005        | √ |   |
| 196 | 10.1371/journal.pmed.0040076.    | √ |   |
| 197 | 0.1016/j.pharep.2016.04.009      | √ |   |
| 198 | 10.1016/j.critrevonc.2018.05.006 | √ |   |
| 199 | 10.1016/j.tem.2012.10.006        | √ |   |
| 200 | 10.1016/j.trecan.2018.10.001     | √ |   |
| 201 | 10.1016/j.pharmthera.2008.09.009 | √ |   |
| 202 | 10.1016/j.ijcard.2015.10.115     | √ |   |
| 203 | 10.1016/j.jacc.2013.01.080       | √ |   |
| 204 | 10.1016/j.beem.2013.09.001       | √ |   |
| 205 | 10.1016/j.numecd.2013.08.009     | √ |   |
| 206 | 10.1016/j.ijcard.2012.09.215     | √ |   |
| 207 | 10.1016/j.arr.2010.08.008        | √ |   |
| 208 | 10.1053/j.jrn.2014.10.025        | √ |   |
| 209 | 10.1016/j.mce.2011.07.011        | √ |   |
| 210 | 10.3967/bes2017.004              | √ |   |
| 211 | 10.1159/000087527                | √ |   |
| 212 | 10.1016/j.pneurobio.2011.10.003  | √ |   |
| 213 | 10.1210/en.2003-0882             | √ |   |

|     |                                       |   |   |
|-----|---------------------------------------|---|---|
| 214 | 10.2337/db10-1106                     | √ |   |
| 215 | 10.1016/j.biochi.2003.10.010          | √ |   |
| 216 | 10.1210/en.2007-0647                  | √ |   |
| 217 | 10.1016/j.jocd.2019.06.002            | √ |   |
| 218 | 10.1016/bs.acc.2019.07.012            | √ |   |
| 219 | 10.1002/hep4.1077                     | √ |   |
| 220 | 0.1016/j.metabol.2015.03.009          | √ |   |
| 221 | 10.1016/j.lfs.2010.01.003             | √ |   |
| 222 | 10.1007/s00125-007-0710-4             | √ |   |
| 223 | 10.1016/j.fct.2010.01.003             | √ |   |
| 224 | 10.1179/2045772314Y.0000000236        | √ |   |
| 225 | 10.1152/ajpregu.00142.2016            | √ |   |
| 226 | 10.1210/en.2006-1371                  | √ |   |
| 227 | 10.1016/j.pnpbp.2007.09.012           | √ |   |
| 228 | 10.1371/journal.pone.0142319          | √ |   |
| 229 | 10.1016/j.arr.2013.09.002             | √ |   |
| 230 | PMID: 24149611                        | √ |   |
| 231 | 10.1210/jc.2005-2556                  | √ |   |
| 232 | 10.1519/JSC.0b013e31827e1644          | √ |   |
| 233 | 10.1016/j.metabol.2009.06.032         | √ |   |
| 234 | 10.1016/j.exger.2004.03.024.          | √ |   |
| 235 | 10.1002/jcsm.12417                    |   | √ |
| 236 | 10.1016/j.metabol.2016.07.002         | √ |   |
| 237 | 10.1210/jc.2013-2373                  | √ |   |
| 238 | 10.1371/journal.pone.0094463          | √ |   |
| 239 | 10.1007/s10522-013-9428-5             | √ |   |
| 240 | 10.1016/j.cophys.2019.03.004          | √ |   |
| 241 | Endocrine reviews, 2018, 39(2)        | √ |   |
| 242 | 10.2337/db19-733-P                    | √ |   |
| 243 | 10.1016/j.atherosclerosis.2018.08.046 | √ |   |
| 244 | 10.1016/j.atherosclerosis.2014.05.940 | √ |   |
| 245 | 10.1016/j.archger.2014.02.008         | √ |   |
| 246 | 10.1016/j.critrevonc.2018.06.011      | √ |   |
| 247 | 10.1016/j.chest.2016.12.006           | √ |   |
| 248 | 10.1016/j.joa.2017.07.009             | √ |   |
| 249 | 10.1016/j.jpeds.2011.05.015           | √ |   |
| 250 | 10.1016/j.lungcan.2014.01.020         | √ |   |
| 251 | 10.1080/21623945.2015.1048051         | √ |   |
| 252 | 10.1210/en.2007-0020                  | √ |   |
| 253 | 10.1093/ije/dyt003                    | √ |   |
| 254 | 10.1016/j.mad.2013.12.001             | √ |   |
| 255 | 10.1055/s-0030-1267174                |   | √ |
| 256 | 10.1038/oby.2009.232                  | √ |   |

|     |                                       |   |   |
|-----|---------------------------------------|---|---|
| 257 | 10.1249/MSS.0000000000000658          | √ |   |
| 258 | 10.1016/j.atherosclerosis.2012.07.013 | √ |   |
| 259 | 10.1016/j.atherosclerosis.2017.06.031 | √ |   |
| 260 | 10.1016/j.archger.2015.02.005         | √ |   |
| 261 | 10.1074/jbc.M311113200                | √ |   |
| 262 | 10.3389/fphys.2019.00459              | √ |   |
| 263 | 10.1016/j.bbalip.2016.02.023          | √ |   |
| 264 | 10.1016/j.gene.2012.04.052            | √ |   |
| 265 | 10.1016/j.neurobiolaging.2015.02.030  | √ |   |
| 266 | 10.1210/jc.2009-0436                  | √ |   |
| 267 | 10.1016/j.biocel.2013.07.016          | √ |   |
| 268 | 10.1016/j.mehy.2016.10.025            | √ |   |
| 269 | 10.1016/j.nutres.2014.04.009          | √ |   |
| 270 | PMID: 23272528                        | √ |   |
| 271 | 10.1016/j.metabol.2005.09.005         | √ |   |
| 272 | j.atherosclerosis.2010.05.005         | √ |   |
| 273 | 10.5603/PiAP.2015.0019                | √ |   |
| 274 | 10.1007/s00415-017-8405-3             | √ |   |
| 275 | 10.1016/j.arcmed.2010.11.007          | √ |   |
| 276 | 10.1016/j.metabol.2013.09.017         | √ |   |
| 277 | 10.1016/j.exger.2011.11.007           |   | √ |
| 278 | 10.1016/j.ejphar.2009.02.030          | √ |   |
| 279 | 10.1016/j.nut.2018.03.052             | √ |   |
| 280 | 10.1016/j.clnu.2009.05.014            | √ |   |
| 281 | 10.1016/j.arcmed.2011.03.002          | √ |   |
| 282 | 10.1016/j.metabol.2015.09.009         | √ |   |
| 283 | 10.1530/EJE-11-0537                   | √ |   |
| 284 | 10.1016/j.transproceed.2018.06.028    | √ |   |
| 285 | 10.1007/s11357-011-9304-7             | √ |   |
| 286 | 10.1210/jc.2003-031315                | √ |   |
| 287 | 10.1016/j.thromres.2003.08.004        | √ |   |
| 288 | 10.1016/j.cca.2009.04.018             | √ |   |
| 289 | 10.1016/j.thromres.2016.09.003        | √ |   |
| 290 | 10.14283/jfa.2017.13                  | √ |   |
| 291 | 10.1152/ajpendo.00620.2012            | √ |   |
| 292 | 10.1055/s-0035-1564132                | √ |   |
| 293 | 10.1016/j.bbadis.2014.11.015          | √ |   |
| 294 | 10.1016/j.metabol.2008.06.017         | √ |   |
| 295 | 10.1152/ajpendo.00506.2005            | √ |   |
| 296 | 10.1210/jc.2008-2505                  | √ |   |
| 297 | 10.1097/MCO.0b013e3282f0ecd2          | √ |   |
| 298 | 10.1016/j.arr.2018.06.005             | √ |   |
| 299 | 10.3945/jn.108.096362                 | √ |   |

|     |                                                                       |   |  |
|-----|-----------------------------------------------------------------------|---|--|
| 300 | 10.1089/jmf.2014.0016                                                 | √ |  |
| 301 | 10.3389/fnagi.2017.00268                                              | √ |  |
| 302 | 10.1016/j.bbagen.2019.129414                                          | √ |  |
| 303 | 10.1007/s00508-015-0883-7                                             | √ |  |
| 304 | 10.1016/j.jnutbio.2009.01.006                                         | √ |  |
| 305 | 10.14814/phy2.13599                                                   | √ |  |
| 306 | 10.1016/j.metabol.2012.05.003                                         | √ |  |
| 307 | 10.1155/2015/534320                                                   | √ |  |
| 308 | 10.1186/1475-2840-13-47                                               | √ |  |
| 309 | 10.1016/j.molmet.2016.08.009                                          | √ |  |
| 310 | 10.1210/en.2011-1490                                                  | √ |  |
| 311 | 10.1038/s41390-019-0428-2                                             | √ |  |
| 312 | 10.1016/j.redox.2017.05.004                                           | √ |  |
| 313 | 10.1016/j.atherosclerosis.2019.01.029                                 | √ |  |
| 314 | 10.1007/978-3-642-17214-4_2                                           | √ |  |
| 315 | 10.1242/dev.095810                                                    | √ |  |
| 316 | j.drudis.2018.05.009                                                  | √ |  |
| 317 | 10.1016/j.biocel.2018.08.013                                          | √ |  |
| 318 | 10.1093/annonc/mdu085                                                 | √ |  |
| 319 | Iranian journal of endocrinology and metabolism, 2010, 12(1)          | √ |  |
| 320 | 10.1016/j.exger.2017.08.036                                           | √ |  |
| 321 | 10.1111/cpf.12005                                                     | √ |  |
| 322 | 10.1016/j.ejbas.2016.12.002                                           | √ |  |
| 323 | 10.1002/hep.25539                                                     | √ |  |
| 324 | Iranian journal of endocrinology and metabolism, 2017, 18(5), 368-377 | √ |  |
| 325 | 10.1007/s11655-016-2518-x                                             | √ |  |
| 326 | 10.1371/journal.pone.0191121                                          | √ |  |
| 327 | PMID: 24881626                                                        | √ |  |
| 328 | 10.1016/j.lfs.2010.03.004                                             | √ |  |
| 329 | 10.1016/j.cca.2010.02.069                                             | √ |  |
| 330 | 10.1016/j.nut.2014.05.014                                             | √ |  |
| 331 | 10.1152/japplphysiol.00683.2005                                       | √ |  |
| 332 | 10.1016/j.fertnstert.2008.01.027                                      | √ |  |
| 333 | 10.1515/jcim-2013-0053                                                | √ |  |
| 334 | 10.1002/dmrr.2662                                                     | √ |  |
| 335 | 10.1016/j.ejphar.2013.12.036                                          | √ |  |
| 336 | 10.1378/chest.08-1705                                                 | √ |  |
| 337 | 10.1016/j.metabol.2015.12.006                                         | √ |  |
| 338 | FASEB journal, 2017, 31(1)                                            | √ |  |
| 339 | 10.1016/j.endinu.2019.09.004                                          | √ |  |
| 340 | 10.1002/jbmr.2701                                                     | √ |  |



|     |                                   |   |   |
|-----|-----------------------------------|---|---|
| 341 | 10.1539/joh.16-0125-OA            | √ |   |
| 342 | 10.1080/02640414.2016.1142107     | √ |   |
| 343 | 10.1111/j.1440-1681.2007.04786.x  | √ |   |
| 344 | 10.3390/nu10070946                | √ |   |
| 345 | 10.1016/j.ypped.2015.09.014       | √ |   |
| 346 | 10.1139/apnm-2018-0355            | √ |   |
| 347 | 10.1038/oby.2006.96               | √ |   |
| 348 | 10.1210/jc.2012-1219              | √ |   |
| 349 | 10.3390/nu10081070                | √ |   |
| 350 | 10.1016/j.steroids.2011.06.004    | √ |   |
| 351 | 10.1200/JCO.2017.75.7526          | √ |   |
| 352 | 10.2169/internalmedicine.50.4380  | √ |   |
| 353 | 0.1007/s12576-011-0174-7          | √ |   |
| 354 | 10.1016/j.ctim.2017.11.023        | √ |   |
| 355 | 10.1016/j.curtheres.2017.07.002   | √ |   |
| 356 | 10.1093/ajh/hps050                | √ |   |
| 357 | 10.1186/s12967-016-1044-0         | √ |   |
| 358 | 10.5551/jat.2089                  | √ |   |
| 359 | 10.1093/eurheartj/ehu322          | √ |   |
| 360 | 10.1002/dmrr.1185                 | √ |   |
| 361 | 10.1007/s00125-019-4866-5         | √ |   |
| 362 | 10.1007/s11655-016-2407-3         | √ |   |
| 363 | 10.1177/0269881106069637          | √ |   |
| 364 | 10.1016/j.numecd.2012.07.005      | √ |   |
| 365 | 10.1016/j.ijcard.2014.11.099      | √ |   |
| 366 | 10.1111/dom.12112                 | √ |   |
| 367 | 10.12965/jer.1938368.184          | √ |   |
| 368 | 10.1249/MSS.0000000000001250      | √ |   |
| 369 | 10.1016/j.clinbiochem.2013.12.019 | √ |   |
| 370 | 10.1016/j.ghir.2015.12.009        | √ |   |
| 371 | 1.368.553.820.171.300.000         | √ |   |
| 372 | 10.1210/en.2013-1166              | √ |   |
| 373 | 10.1152/ajpendo.00089.2007        | √ |   |
| 374 | 10.1007/s00421-016-3466-z         | √ |   |
| 375 | 10.1016/j.phrs.2016.09.029        | √ |   |
| 376 | /10.1111/dom.12745                | √ |   |
| 377 | 10.1016/j.clinthera.2016.01.017   | √ |   |
| 378 | ACTRN12618001215213               | √ |   |
| 379 | 10.1378/chest.07-0227             |   | √ |
| 380 | 10.1136/bmjdr-2018-000537         | √ |   |
| 381 | 10.1016/j.metabol.2009.08.015     | √ |   |
| 382 | 10.1016/j.metabol.2014.10.024     | √ |   |
| 383 | 10.1016/s1098-3597(08)60026-5     | √ |   |

|     |                                       |   |  |
|-----|---------------------------------------|---|--|
| 384 | 10.1016/j.domaniend.2015.11.007       | √ |  |
| 385 | 10.1152/ajpheart.01032.2009           | √ |  |
| 386 | 10.5935/abc.20180086                  | √ |  |
| 387 | 10.1016/j.cmet.2012.08.012            | √ |  |
| 388 | 10.1016/j.biomaterials.2019.119416    | √ |  |
| 389 | 10.1016/j.atherosclerosis.2013.02.026 | √ |  |
| 390 | 10.1152/ajpendo.00123.2007            | √ |  |
| 391 | 10.1053/j.gastro.2003.08.029          | √ |  |
| 392 | 10.1152/ajpregu.00228.2014            | √ |  |
| 393 | 10.2353/ajpath.2010.090647            | √ |  |
| 394 | 10.1016/j.bbrc.2008.02.092            | √ |  |
| 395 | 10.1016/B978-0-12-800101-1.00005-3    | √ |  |
| 396 | 10.1371/journal.pone.0173984          | √ |  |
| 397 | 10.1016/S2213-8587(18)30204-3         | √ |  |
| 398 | 10.18632/oncotarget.3587              | √ |  |
| 399 | 10.1016/j.clnu.2018.12.022            | √ |  |
| 400 | 10.1530/JOE-14-0008                   | √ |  |
| 401 | 10.1677/joe.1.06227                   | √ |  |
| 402 | 10.1152/ajpendo.00707.2009            | √ |  |
| 403 | 10.1053/j.jrn.2013.01.001             | √ |  |
| 404 | 10.1016/j.transproceed.2019.04.057    | √ |  |
| 405 | 10.1074/jbc.M409580200                | √ |  |
| 406 | 0.1007/s00198-015-3223-x              | √ |  |
| 407 | 10.1016/j.cger.2015.04.001            | √ |  |
| 408 | 10.1155/2016/4219735                  | √ |  |
| 409 | 10.1111/dom.12680                     | √ |  |
| 410 | 10.2337/db16-1771-2041                | √ |  |
| 411 | 10.1152/japplphysiol.00890.2007       | √ |  |
| 412 | 10.1016/j.maturitas.2017.09.003       | √ |  |
| 413 | 0.1186/s12986-015-0052-z              | √ |  |
| 414 | 10.1002/jbmr.5650251305               | √ |  |
| 415 | 10.1002/jcsm.12166                    | √ |  |
| 416 | 10.1016/j.peptides.2011.01.027        | √ |  |
| 417 | 10.1249/MSS.0000000000000338          | √ |  |
| 418 | 10.1111/j.1743-6109.2011.02337.x      | √ |  |
| 419 | doi.org/10.1016/j.cct.2015.10.002     | √ |  |
| 420 | 10.1111/jog.13482                     | √ |  |
| 421 | 10.2527/2005.833565x                  | √ |  |
| 422 | 10.1152/ajpendo.00155.2004            | √ |  |
| 423 | 10.1111/age.12082                     | √ |  |
| 424 | 10.2169/internalmedicine.48.1102      | √ |  |
| 425 | 10.1016/j.addr.2014.10.021            | √ |  |
| 426 | 10.1002/hep.24666                     | √ |  |

|     |                                    |   |   |
|-----|------------------------------------|---|---|
| 427 | 10.1016/j.eurger.2016.09.005       | √ |   |
| 428 | 10.1038/ismej.2017.24              | √ |   |
| 429 | 10.1038/sj.ijo.0802853             | √ |   |
| 430 | 10.1210/en.2011-1518               | √ |   |
| 431 | PMID: 17598332                     | √ |   |
| 432 | 10.1093/gerona/62.12.1393          | √ |   |
| 433 | 10.2337/db08-0006                  | √ |   |
| 434 | 10.1016/j.jand.2012.08.013         | √ |   |
| 435 | 10.1530/EC-12-0003                 | √ |   |
| 436 | 10.1016/B978-0-12-802844-5.00011-7 | √ |   |
| 437 | 10.1152/ajpregu.00328.2011         | √ |   |
| 438 | 10.1016/j.metabol.2012.09.002      | √ |   |
| 439 | 10.1016/j.mam.2016.06.001          | √ |   |
| 440 | 10.1016/j.arr.2017.01.006          | √ |   |
| 441 | 10.1053/j.jrn.2017.07.007          | √ |   |
| 442 | 10.1016/j.mad.2019.03.007          | √ |   |
| 443 | 10.1053/j.jvca.2018.08.002         | √ |   |
| 444 | 10.1016/j.ecl.2013.02.006          | √ |   |
| 445 | 10.1016/j.trre.2016.07.006         | √ |   |
| 446 | 10.1161/CIRCULATIONAHA.114.015248  | √ |   |
| 447 | 10.1016/j.nut.2010.08.005          | √ |   |
| 448 | 10.1016/j.mehy.2014.06.014         | √ |   |
| 449 | 10.1016/j.jvs.2014.02.045          | √ |   |
| 450 | 10.1016/j.archger.2017.04.006      | √ |   |
| 451 | 10.1186/1471-2318-14-8             | √ |   |
| 452 | 10.1016/j.mce.2015.02.010          | √ |   |
| 453 | 10.2337/dc07-1257                  | √ |   |
| 454 | 10.1016/j.bbrc.2007.09.128         | √ |   |
| 455 | 10.1186/1471-2350-13-22            | √ |   |
| 456 | 10.1016/j.beem.2017.02.005         | √ |   |
| 457 | 10.1016/j.clnu.2014.08.010         | √ |   |
| 458 | 10.1152/ajpendo.00460.2007         | √ |   |
| 459 | 10.1016/j.arr.2018.02.002          | √ |   |
| 460 | PMID: 12173692                     | √ |   |
| 461 | 10.2337/db06-1405                  | √ |   |
| 462 | 10.1016/j.bone.2017.08.005         |   | √ |
| 463 | 10.1016/j.cardiores.2007.04.011    | √ |   |
| 464 | 10.1016/j.tem.2013.12.006          | √ |   |
| 465 | 10.1152/physiolgenomics.00042.2011 | √ |   |
| 466 | 10.1186/1743-7075-9-90             | √ |   |
| 467 | 10.1016/j.nutres.2012.05.001       | √ |   |
| 468 | 10.1016/j.jff.2019.103679          | √ |   |
| 469 | 10.1016/j.cyto.2019.01.011         | √ |   |

|     |                                    |   |   |
|-----|------------------------------------|---|---|
| 470 | 10.1016/j.beem.2013.05.003         | √ |   |
| 471 | NCT01343641                        | √ |   |
| 472 | 10.1111/j.1440-1681.2007.04786.x   | √ |   |
| 473 | 10.1016/j.arr.2017.09.001          | √ |   |
| 474 | 10.1093/ndt/gfq817                 | √ |   |
| 475 | 10.1016/j.exger.2018.11.014        | √ |   |
| 476 | 10.1155/2015/783296                | √ |   |
| 477 | 0.1210/jc.2015-1787                | √ |   |
| 478 | 10.3892/mmr_00000292               | √ |   |
| 479 | 10.1210/jc.2018-01808              | √ |   |
| 480 | 10.1016/j.orcp.2011.04.008         | √ |   |
| 481 | 10.1016/j.ijcard.2016.11.194       | √ |   |
| 482 | 10.1097/HJR.0b013e32833b09d9       | √ |   |
| 483 | 10.1016/j.cca.2013.12.037          | √ |   |
| 484 | 10.1016/j.numecd.2015.03.010       |   | √ |
| 485 | 10.1210/jc.2008-0009               | √ |   |
| 486 | 10.1155/2012/395757                | √ |   |
| 487 | 10.1016/j.ijcard.2015.01.057       |   | √ |
| 488 | 10.2337/db07-0932                  | √ |   |
| 489 | 10.1007/s00421-011-2073-2          | √ |   |
| 490 | 10.1016/j.cger.2019.07.011         | √ |   |
| 491 | PMID: 31929469                     | √ |   |
| 492 | 10.1007/s40520-017-0840-6          |   | √ |
| 493 | 10.2310/JIM.0b013e3182746ce8       | √ |   |
| 494 | 10.1016/j.ultrasmedbio.2019.05.029 | √ |   |
| 495 | 10.1093/gerona/glv123              |   | √ |
| 496 | 10.1016/j.molmed.2010.03.002       | √ |   |
| 497 | 10.1007/s00125-016-4046-9          | √ |   |
| 498 | PIMID:25489546                     | √ |   |
| 499 | 10.1016/j.jnutbio.2010.01.001      | √ |   |
| 500 | 10.1007/s12020-018-1550-3          | √ |   |
| 501 | 10.1111/j.1559-4564.2007.06597.x   | √ |   |
| 502 | 10.1089/met.2010.0018              | √ |   |
| 503 | 10.1016/j.eurger.2012.02.008       | √ |   |
| 504 | 10.1080/19490976.2016.1239680      | √ |   |
| 505 | 10.1016/j.jpba.2016.03.027         |   | √ |
| 506 | 10.1001/archinte.168.15.1609       | √ |   |
| 507 | 10.1093/jb/mvt008                  | √ |   |
| 508 | 10.1007/s12041-011-0027-4          | √ |   |
| 509 | 10.1111/j.1523-1755.2005.00200.x   | √ |   |
| 510 | 10.1016/j.critrevonc.2019.102857   | √ |   |
| 511 | 0.1016/j.clnu.2015.06.010          | √ |   |
| 512 | NCT04096469                        | √ |   |

|     |                                                              |   |   |
|-----|--------------------------------------------------------------|---|---|
| 513 | 10.1210/en.2017-00460.                                       | √ |   |
| 514 | 10.1016/j.ekir.2017.12.009                                   | √ |   |
| 515 | 10.1016/j.surg.2015.02.002                                   | √ |   |
| 516 | 10.1016/j.atherosclerosis.2016.07.897                        | √ |   |
| 517 | 10.1016/j.surg.2015.08.047                                   | √ |   |
| 518 | Iranian journal of endocrinology and metabolism, 2010, 12(3) | √ |   |
| 519 | 10.1016/j.metabol.2014.04.004                                | √ |   |
| 520 | 10.1111/jdi.12731                                            | √ |   |
| 521 | 10.1016/j.fertnstert.2010.05.018                             | √ |   |
| 522 | 10.1016/j.diabres.2017.11.031                                | √ |   |
| 523 | 10.1016/j.gtc.2019.09.005                                    | √ |   |
| 524 | 10.1016/j.thromres.2008.01.010                               | √ |   |
| 525 | 10.1016/j.cyto.2006.09.002                                   | √ |   |
| 526 | 10.1089/met.2017.0011                                        | √ |   |
| 527 | 10.1016/j.dsx.2015.09.007                                    | √ |   |
| 528 | 10.1111/j.1749-6632.2002.tb04292.x                           | √ |   |
| 529 | 10.1016/j.diabres.2006.02.014                                | √ |   |
| 530 | 10.1016/j.clnesp.2019.05.006                                 | √ |   |
| 531 | 10.1016/j.bone.2010.12.018                                   | √ |   |
| 532 | 10.1016/j.tem.2016.09.005                                    | √ |   |
| 533 | 10.1016/j.mad.2016.12.008                                    | √ |   |
| 534 | 10.1016/j.arr.2019.100980                                    | √ |   |
| 535 | 10.1038/sj.ki.5001969                                        | √ |   |
| 536 | 10.1016/j.metabol.2013.07.004                                | √ |   |
| 537 | 10.1016/j.bone.2016.01.019                                   | √ |   |
| 538 | 10.1186/s12891-018-2325-y                                    | √ |   |
| 539 | 10.1016/j.metabol.2009.12.011                                | √ |   |
| 540 | 10.1007/s40520-018-1029-3                                    |   | √ |
| 541 | 10.1080/21551197.2018.1564200                                | √ |   |
| 542 | 10.1093/annonc/mdx815                                        | √ |   |
| 543 | 10.1053/j.jrn.2012.08.013                                    | √ |   |
| 544 | 10.1016/j.cger.2008.03.006                                   | √ |   |
| 545 | 10.3899/jrheum.150280                                        |   | √ |
| 546 | 10.2337/dc08-1994                                            | √ |   |
| 547 | 10.1016/j.mce.2012.12.009                                    | √ |   |
| 548 | 10.1016/j.peptides.2014.10.006                               | √ |   |
| 549 | PMID: 21681172                                               | √ |   |
| 550 | 10.1016/j.amjcard.2015.07.060                                | √ |   |
| 551 | 10.1016/j.arr.2014.02.007                                    | √ |   |
| 552 | 10.1016/j.lfs.2018.10.014                                    | √ |   |
| 553 | 10.1016/j.numecd.2013.03.006                                 |   | √ |
| 554 | 10.1016/j.metabol.2008.05.001                                | √ |   |

|     |                                   |   |  |
|-----|-----------------------------------|---|--|
| 555 | 10.1016/j.exger.2018.06.013       | √ |  |
| 556 | 10.1016/j.yclnex.2018.10.004      | √ |  |
| 557 | 10.1016/j.psyneuen.2018.12.227    | √ |  |
| 558 | 10.1016/j.yexmp.2013.10.002       | √ |  |
| 559 | 10.1016/j.bone.2015.07.013        | √ |  |
| 560 | 10.1016/j.numecd.2018.06.020      | √ |  |
| 561 | 10.33963/KP.14989                 | √ |  |
| 562 | 10.1016/j.cmet.2019.12.002        | √ |  |
| 563 | 10.1016/j.numecd.2009.03.002      | √ |  |
| 564 | 10.1016/j.cger.2014.08.019        | √ |  |
| 565 | 10.1186/s12944-017-0547-x         | √ |  |
| 566 | 10.2337/db10-0698                 | √ |  |
| 567 | 10.1016/S1388-1981(02)00342-6     | √ |  |
| 568 | 10.1172/jci.insight.128405        | √ |  |
| 569 | 10.2337/db09-1541                 | √ |  |
| 570 | 10.1016/j.arr.2006.03.004         | √ |  |
| 571 | 10.1038/ncomms12205               | √ |  |
| 572 | 10.1530/EJE-07-0169               | √ |  |
| 573 | 10.1530/EJE-11-0289               | √ |  |
| 574 | 10.1093/gerona/62.3.330           | √ |  |
| 575 | 10.1016/j.diabet.2016.07.027      | √ |  |
| 576 | 10.1016/j.ijcard.2007.09.004      | √ |  |
| 577 | PMID: 17392141                    | √ |  |
| 578 | 10.1186/s12933-018-0755-3         | √ |  |
| 579 | 10.1016/j.metabol.2008.03.019     | √ |  |
| 580 | 10.1089/neu.2018.6136             | √ |  |
| 581 | 10.1016/j.clgc.2013.05.004        | √ |  |
| 582 | 10.1016/j.ecl.2015.07.010         | √ |  |
| 583 | 10.1016/j.disamonth.2019.06.008   | √ |  |
| 584 | doi.org/10.1016/j.dld.2019.06.002 | √ |  |
| 585 | 10.1016/j.ajg.2018.08.003         | √ |  |
| 586 | 10.1016/j.mad.2015.03.006         | √ |  |
| 587 | 10.1038/s41598-017-12597-9        | √ |  |
| 588 | 10.1002/mnfr.201900072            | √ |  |
| 589 | 10.1016/j.maturitas.2013.03.014   | √ |  |
| 590 | 10.2337/diabetes.53.6.1621        | √ |  |
| 591 | 10.3945/ajcn.115.109173           | √ |  |
| 592 | 10.1007/s00421-014-2879-9         | √ |  |
| 593 | 10.1002/oby.20212                 | √ |  |
| 594 | 10.1016/j.juro.2012.11.017        | √ |  |
| 595 | 10.1016/j.metabol.2011.10.005     | √ |  |
| 596 | 10.1016/j.cell.2016.07.031        | √ |  |
| 597 | 10.1016/j.diabet.2012.03.001      | √ |  |

|     |                                    |   |   |
|-----|------------------------------------|---|---|
| 598 | j.1463-1326.2011.01429.x           | √ |   |
| 599 | 10.3109/08037051.2013.791411       | √ |   |
| 600 | doi.org/10.1016/j.jacc.2014.04.083 | √ |   |
| 601 | 10.1136/thoraxjnl-2017-211073      | √ |   |
| 602 | 10.1016/j.dsx.2007.11.008          | √ |   |
| 603 | 10.1016/j.phrs.2018.01.009         | √ |   |
| 604 | 10.1016/j.ijcard.2011.09.079       | √ |   |
| 605 | 10.1371/journal.pone.0051357       | √ |   |
| 606 | 10.1016/j.jss.2013.06.002          | √ |   |
| 607 | 10.1210/en.2003-0870               | √ |   |
| 608 | 10.1016/j.bbali.2017.05.011        | √ |   |
| 609 | 10.1016/j.biotechadv.2012.09.005   | √ |   |
| 610 | 10.1016/j.mad.2016.12.005          | √ |   |
| 611 | 10.1007/s10545-011-9338-0          | √ |   |
| 612 | 10.1016/j.bbcan.2018.07.008        | √ |   |
| 613 | 10.1016/j.biocel.2013.06.024       | √ |   |
| 614 | 10.1016/j.mad.2019.04.003          | √ |   |
| 615 | doi.org/10.1016/j.arr.2008.07.002  | √ |   |
| 616 | 10.1111/j.1749-6632.1999.tb07793.x | √ |   |
| 617 | 10.1210/jc.2018-01771              | √ |   |
| 618 | 10.1016/j.cca.2006.07.005          | √ |   |
| 619 | 10.1016/j.arr.2016.09.012          | √ |   |
| 620 | 10.1016/j.arr.2011.09.001          | √ |   |
| 621 | 10.1089/scd.2016.0166              | √ |   |
| 622 | 10.1016/j.metabol.2015.05.008      | √ |   |
| 623 | 10.1161/01.CIR.0000150391.38660.9B | √ |   |
| 624 | 10.1016/j.arr.2015.03.002          | √ |   |
| 625 | 10.3899/jrheum.170513              | √ |   |
| 626 | 10.1016/j.bone.2016.10.024         | √ |   |
| 627 | 10.1016/j.jhep.2018.06.005         | √ |   |
| 628 | 10.1016/j.amjcard.2014.05.050      | √ |   |
| 629 | 10.1038/srep41792                  | √ |   |
| 630 | 10.1186/s13098-019-0458-2. P       | √ |   |
| 631 | 10.1016/j.imlet.2018.09.002        | √ |   |
| 632 | 10.1016/j.cyto.2017.12.008         | √ |   |
| 633 | 10.1210/en.2005-0362               | √ |   |
| 634 | 10.1016/j.dld.2019.03.002          | √ |   |
| 635 | 10.1016/j.drudis.2012.02.001       | √ |   |
| 636 | 10.1016/j.archger.2013.06.001      |   | √ |
| 637 | 10.1371/journal.pone.0166804       | √ |   |
| 638 | 10.1016/j.arr.2018.05.006          | √ |   |
| 639 | 10.1016/j.cmet.2017.11.002         | √ |   |
| 640 | 10.1677/JOE-10-0104                | √ |   |

|     |                                    |   |   |
|-----|------------------------------------|---|---|
| 641 | 10.1016/j.mce.2015.05.033          | √ |   |
| 642 | 10.1371/journal.pone.0178123       |   | √ |
| 643 | 10.1016/j.phrs.2015.12.010         | √ |   |
| 644 | 10.1210/en.2011-1343               | √ |   |
| 645 | 10.1016/j.maturitas.2019.03.016    | √ |   |
| 646 | 10.1038/ijo.2010.123               | √ |   |
| 647 | 10.1161/CIRCRESAHA.111.258673      | √ |   |
| 648 | 10.1016/j.bbamcr.2018.02.010       | √ |   |
| 649 | 10.1016/j.jceh.2017.11.001         | √ |   |
| 650 | 10.1016/j.mad.2014.01.008          | √ |   |
| 651 | 10.1016/j.arr.2017.02.002          | √ |   |
| 652 | 10.1016/j.cardfail.2019.03.007     | √ |   |
| 653 | 10.1016/B978-0-12-801238-3.00154-9 | √ |   |
| 654 | 10.1016/j.metabol.2018.11.001      | √ |   |
| 655 | 10.1016/j.metabol.2018.10.011      | √ |   |
| 656 | 10.1016/j.exger.2013.06.007        | √ |   |
| 657 | 10.1016/j.metabol.2018.11.014      | √ |   |
| 658 | 10.1016/j.pan.2019.08.008          | √ |   |
| 659 | 10.1016/B978-0-12-809657-4.10899-3 | √ |   |
| 660 | 10.1016/j.cgh.2018.07.006          | √ |   |
| 661 | 10.1016/j.beem.2013.04.01          | √ |   |
| 662 | 10.1016/j.dld.2017.07.004          | √ |   |
| 663 | 10.1053/j.jrn.2013.09.002          | √ |   |
| 664 | 10.1016/j.metabol.2013.05.019      | √ |   |
| 665 | 10.1159/000489691                  | √ |   |
| 666 | doi.org/10.1016/j.jtho.2017.07.022 | √ |   |
| 667 | 10.1172/JCI31021                   | √ |   |
| 668 | 10.1096/fj.08-125674               | √ |   |
| 669 | 10.1038/ijo.2010.135               | √ |   |
| 670 | 10.1016/j.suc.2016.03.013          | √ |   |
| 671 | 10.1016/j.smr.2018.08.009          | √ |   |
| 672 | 10.1016/j.pathophys.2017.08.003    | √ |   |
| 673 | 10.2337/dc10-1002                  | √ |   |
| 674 | 10.1016/j.clnu.2011.05.009         | √ |   |
| 675 | 10.1074/jbc.C200312200             | √ |   |
| 676 | 10.2337/db12-1042                  | √ |   |
| 677 | 10.1016/j.rbmo.2009.05.003         | √ |   |
| 678 | 10.1016/j.bone.2012.08.117         | √ |   |
| 679 | 10.1016/j.cger.2008.03.012         | √ |   |
| 680 | 10.1016/j.rehab.2016.04.002        | √ |   |
| 681 | 10.1016/j.exger.2020.110884        |   | √ |
| 682 | 10.2147/IJICMR.S19007              | √ |   |
| 683 | 10.1016/j.lfs.2009.02.026          | √ |   |



|     |                                            |   |   |
|-----|--------------------------------------------|---|---|
| 684 | 10.2337/db14-1611                          | √ |   |
| 685 | 10.1093/humrep/dew279                      | √ |   |
| 686 | 10.1017/S0954422412000145                  | √ |   |
| 687 | 10.1159/000074501                          | √ |   |
| 688 | 10.1590/s0100-879x2012007500097            | √ |   |
| 689 | 10.1016/j.cca.2008.10.009                  | √ |   |
| 690 | 10.1007/s10068-018-0378-1                  | √ |   |
| 691 | 10.1038/ijo.2008.233                       | √ |   |
| 692 | 10.1016/j.cophys.2018.02.013               | √ |   |
| 693 | 10.1016/j.cger.2011.03.005                 | √ |   |
| 694 | 10.1371/journal.pone.0122660               | √ |   |
| 695 | 10.1016/j.numecd.2009.10.007               | √ |   |
| 696 | 10.2337/diacare.28.3.755                   | √ |   |
| 697 | 10.1016/j.metabol.2007.06.014              |   | √ |
| 698 | 10.1016/j.numecd.2013.04.015               |   | √ |
| 699 | 10.1016/j.numecd.2010.01.014               | √ |   |
| 700 | 10.1016/j.cca.2006.01.021                  |   | √ |
| 701 | 10.1210/jc.2004-2549                       | √ |   |
| 702 | 10.1016/j.jacc.2006.05.054                 | √ |   |
| 703 | 10.1016/j.jstrokecerebrovasdis.2008.10.001 | √ |   |
| 704 | 10.1038/s41393-018-0089-8                  | √ |   |
| 705 | 10.1055/s-2005-865661                      | √ |   |
| 706 | 10.1080/10790268.2017.1405154              | √ |   |
| 707 | 10.1111/j.1600-0838.2006.00602.x           | √ |   |
| 708 | 10.1016/j.ahj.2011.09.029                  | √ |   |
| 709 | 10.2147/DMSO.S220050                       | √ |   |
| 710 | 10.1538/expanim.62.347                     | √ |   |
| 711 | 10.2527/jas.2009-2597                      | √ |   |
| 712 | 10.1016/j.yhbeh.2010.02.008                | √ |   |
| 713 | 10.1371/journal.pone.0011307               | √ |   |
| 714 | 10.1016/j.clnu.2018.01.032                 | √ |   |
| 715 | 10.1016/j.nut.2015.01.009                  | √ |   |
| 716 | 10.1016/j.yapd.2016.04.005                 | √ |   |
| 717 | 10.1016/j.healun.2018.07.015               | √ |   |
| 718 | 10.1038/ijo.2013.77                        | √ |   |
| 719 | 10.1016/j.mad.2013.12.006                  | √ |   |
| 720 | 10.1253/circj.cj-11-1549                   | √ |   |
| 721 | 10.1016/j.diabres.2016.07.017              | √ |   |
| 722 | 10.1016/j.plipres.2015.03.001              | √ |   |
| 723 | /j.atherosclerosis.2015.02.009             | √ |   |
| 724 | 10.1371/journal.pone.0210120               | √ |   |
| 725 | 10.1016/j.clnu.2016.06.007                 | √ |   |
| 726 | 10.1073/pnas.041591798                     | √ |   |

|     |                                    |   |   |
|-----|------------------------------------|---|---|
| 727 | 10.18632/aging.102044              | √ |   |
| 728 | 10.1056/NEJMoa1113966              | √ |   |
| 729 | 10.1017/S0007114513002584          | √ |   |
| 730 | 10.1053/j.ajkd.2018.06.024         | √ |   |
| 731 | 10.1016/j.kjms.2017.05.008         | √ |   |
| 732 | 10.1016/j.diabres.2018.02.009      | √ |   |
| 733 | 10.1016/j.afos.2015.07.009         | √ |   |
| 734 | 10.1016/j.redox.2015.06.019        | √ |   |
| 735 | 10.1093/jn/135.11.2517             | √ |   |
| 736 | 10.1016/j.ajpath.2014.05.012       | √ |   |
| 737 | 10.1002/pbc.25601                  | √ |   |
| 738 | 10.1152/ajpgi.00526.2007           | √ |   |
| 739 | 10.1007/s00125-005-1686-6          | √ |   |
| 740 | 10.1152/ajpendo.00245.2006         | √ |   |
| 741 | 10.1016/j.beem.2013.06.003         | √ |   |
| 742 | 10.1016/j.plipres.2013.12.001      | √ |   |
| 743 | 10.1016/j.mce.2016.11.014          | √ |   |
| 744 | 10.1016/j.mad.2018.07.004          | √ |   |
| 745 | 10.5099/aj090200133                | √ |   |
| 746 | 10.3177/jnsv.59.393                | √ |   |
| 747 | 10.1016/j.diabres.2010.09.008      | √ |   |
| 748 | 10.1016/j.amjcard.2010.01.368      | √ |   |
| 749 | 10.1016/j.amjcard.2012.12.043      | √ |   |
| 750 | 10.1016/j.cca.2006.01.022          | √ |   |
| 751 | 10.1016/j.spinee.2014.06.009       | √ |   |
| 752 | 10.1152/physiolgenomics.00058.2013 | √ |   |
| 753 | 10.1159/000148648                  | √ |   |
| 754 | 10.1097/MAJ.0b013e3182112bcd       | √ |   |
| 755 | 10.1016/j.dsx.2017.09.004          | √ |   |
| 756 | 10.2147/DMSO.S16175                | √ |   |
| 757 | 10.1016/j.maturitas.2012.09.009    | √ |   |
| 758 | 10.12659/MSM.889362                | √ |   |
| 759 | 10.1016/j.cyto.2012.10.021         | √ |   |
| 760 | 10.1016/j.exger.2015.07.006        |   | √ |
| 761 | 10.2337/db07-1739                  | √ |   |
| 762 | 10.1152/japplphysiol.00485.2013    | √ |   |
| 763 | 10.1249/MSS.0b013e3182644984       | √ |   |
| 764 | 10.1016/j.regpep.2014.10.001       | √ |   |
| 765 | 10.1016/j.mad.2010.02.007          | √ |   |
| 766 | 10.1677/jme.1.00010                | √ |   |
| 767 | 10.1073/pnas.1205675109            | √ |   |
| 768 | 10.1371/journal.pone.0014205       | √ |   |
| 769 | 10.1016/j.clinthera.2019.01.006    | √ |   |

|     |                                      |   |   |
|-----|--------------------------------------|---|---|
| 770 | 10.1074/jbc.M807120200               | √ |   |
| 771 | 10.1016/j.dsx.2016.12.027            | √ |   |
| 772 | 10.1053/j.gastro.2017.01.046         | √ |   |
| 773 | 10.1016/j.mad.2019.01.008            | √ |   |
| 774 | 10.1053/j.jrn.2007.05.006            |   | √ |
| 775 | 10.1074/jbc.M309469200               | √ |   |
| 776 | 0.1016/j.diabet.2019.02.006          | √ |   |
| 777 | 10.3390/biom9120780                  | √ |   |
| 778 | 10.1016/j.eujim.2018.09.002          | √ |   |
| 779 | 10.1016/j.diabres.2018.05.041        | √ |   |
| 780 | 10.1016/j.bbagen.2009.01.008         | √ |   |
| 781 | 10.1111/j.1464-5491.2009.02868.x     | √ |   |
| 782 | 10.1016/j.pathophys.2018.05.001      | √ |   |
| 783 | 10.1016/j.peptides.2013.11.003       | √ |   |
| 784 | 10.1016/j.arr.2015.05.001            | √ |   |
| 785 | 10.1016/j.jhep.2015.05.014           | √ |   |
| 786 | 10.1016/j.jvs.2014.10.094            | √ |   |
| 787 | doi.org/10.1016/j.ijcard.2017.03.155 | √ |   |
| 788 | 10.1016/j.jhep.2015.02.031           | √ |   |
| 789 | 10.1016/j.clnu.2016.03.028           |   | √ |
| 790 | 10.1155/2013/204164                  | √ |   |
| 791 | 10.1016/j.arr.2016.09.008            | √ |   |
| 792 | 10.1016/j.diabres.2016.03.019        | √ |   |
| 793 | 10.1515/jpem.2009.22.5.409           | √ |   |
| 794 | 10.1007/s00395-013-0390-9            | √ |   |
| 795 | 0.1515/pjvs-2016-0056                | √ |   |
| 796 | 10.1016/j.amepre.2011.09.023         |   | √ |
| 797 | 10.1111/j.1532-5415.2011.03865.x     |   | √ |
| 798 | 10.2337/db10-0650                    | √ |   |
| 799 | 10.1007/s11897-019-00437-y           | √ |   |
| 800 | 10.1016/j.diabres.2013.05.014        |   | √ |
| 801 | 10.1016/j.dsx.2009.07.012            | √ |   |
| 802 | 10.3390/ijerph120911528              | √ |   |
| 803 | 10.1016/j.nut.2016.06.014            |   | √ |
| 804 | 10.1016/j.cyto.2009.01.003           | √ |   |
| 805 | 10.1016/j.jad.2011.07.029            | √ |   |
| 806 | 10.1016/j.dsx.2019.04.048            | √ |   |
| 807 | 10.1016/j.arcmed.2010.08.012         | √ |   |
| 808 | 10.1016/j.metabol.2005.08.011        | √ |   |
| 809 | 10.1016/j.exger.2019.03.005          |   | √ |
| 810 | 10.1016/j.metabol.2010.05.001        | √ |   |
| 811 | 10.1016/j.metabol.2006.04.015        | √ |   |
| 812 | 10.1016/j.ejcdt.2014.01.004          | √ |   |

|     |                                       |   |   |
|-----|---------------------------------------|---|---|
| 813 | 10.1016/j.euf.2015.06.012             | √ |   |
| 814 | 10.1016/j.exger.2009.10.012           | √ |   |
| 815 | 10.1016/j.ejim.2013.02.012            |   | √ |
| 816 | 10.1016/j.metabol.2006.12.008         |   | √ |
| 817 | 10.1016/j.aller.2016.09.004           | √ |   |
| 818 | 10.1007/s40520-016-0626-2             |   | √ |
| 819 | 10.1016/j.bone.2013.07.018            | √ |   |
| 820 | 10.3892/mmr.2013.1522                 | √ |   |
| 821 | 10.1210/jc.2007-0325                  | √ |   |
| 822 | 10.1186/cc13048                       | √ |   |
| 823 | 10.1016/j.trsl.2009.08.003            | √ |   |
| 824 | 10.1016/j.diabres.2016.11.005         | √ |   |
| 825 | 10.5665/sleep.4568                    | √ |   |
| 826 | 10.1111/cen.13563                     | √ |   |
| 827 | 10.2337/diacare.27.2.308              | √ |   |
| 828 | 10.1113/expphysiol.2012.070300        | √ |   |
| 829 | 10.1152/ajpheart.00593.2012           | √ |   |
| 830 | 10.1111/j.1365-2265.2008.03373.x      | √ |   |
| 831 | 10.1016/j.arr.2018.08.001             | √ |   |
| 832 | 10.1111/j.1463-1326.2008.00856.x      | √ |   |
| 833 | 10.1016/j.aprim.2019.07.019           | √ |   |
| 834 | 10.1016/j.arr.2013.05.007             | √ |   |
| 835 | 10.1016/j.diabres.2003.12.008         | √ |   |
| 836 | 10.1016/j.jada.2011.03.011            | √ |   |
| 837 | 10.2337/db13-1423                     | √ |   |
| 838 | 10.1055/s-0030-1253404                |   | √ |
| 839 | 10.1016/j.metabol.2010.10.001         | √ |   |
| 840 | 10.1016/S0006-291X(02)00680-0         | √ |   |
| 841 | 10.3390/nu11071461                    | √ |   |
| 842 | 10.1016/j.dsx.2020.06.006             | √ |   |
| 843 | 10.1055/s-0030-1269905                | √ |   |
| 844 | 10.14814/phy2.13848                   | √ |   |
| 845 | 10.1016/j.jacl.2020.01.002            |   | √ |
| 846 | 10.1016/B978-0-12-809657-4.99647-9    | √ |   |
| 847 | 10.1371/journal.pone.0154119          | √ |   |
| 848 | 10.1055/s-0030-1269846                | √ |   |
| 849 | 10.1016/j.archger.2016.04.017         | √ |   |
| 850 | 10.1016/j.mce.2016.09.013             | √ |   |
| 851 | 10.1007/s00421-014-2953-3             | √ |   |
| 852 | 10.1016/j.atherosclerosis.2009.01.022 | √ |   |
| 853 | 10.3390/ijms19051339                  | √ |   |
| 854 | 10.3390/molecules23051205             | √ |   |
| 855 | 10.1007/s12020-017-1460-9             | √ |   |

|     |                                  |   |   |
|-----|----------------------------------|---|---|
| 856 | 10.1038/s41598-017-16979-x       | √ |   |
| 857 | 10.1210/jc.2008-0782             | √ |   |
| 858 | 10.1249/MSS.0000000000000526     | √ |   |
| 859 | 10.7150/ijms.4.19                | √ |   |
| 860 | 10.1016/j.ijcard.2013.10.031     | √ |   |
| 861 | 10.1111/j.1748-1716.2012.02409.x | √ |   |
| 862 | 10.1074/jbc.M207198200           | √ |   |
| 863 | JPRN-UMIN000020427               | √ |   |
| 864 | 10.1016/j.fertnstert.2007.03.085 | √ |   |
| 865 | 10.1210/jc.2004-0224             | √ |   |
| 866 | 10.1016/j.prp.2016.02.005        | √ |   |
| 867 | 10.1016/j.cmet.2017.09.020       | √ |   |
| 868 | 10.1093/gerona/glz001            |   | √ |
| 869 | 10.1016/j.metabol.2019.03.003    | √ |   |
| 870 | 10.1073/pnas.0403382101          | √ |   |
| 871 | 10.1016/j.amjhyper.2006.12.010   | √ |   |
| 872 | 10.1016/j.bcp.2019.02.030        | √ |   |
| 873 | 10.1016/j.fct.2019.05.052        | √ |   |
| 874 | PMID: 28673384                   | √ |   |
| 875 | 10.1139/apnm-2015-0123           | √ |   |
| 876 | 10.1016/j.tem.2006.10.010        | √ |   |
| 877 | 10.1016/j.jacc.2016.06.072       | √ |   |
| 878 | 10.1093/gerona/gly017            |   | √ |
| 879 | 10.1016/j.arr.2012.03.002        | √ |   |
| 880 | 10.1016/j.jevs.2018.11.005       | √ |   |
| 881 | 10.1530/JOE-17-0656              | √ |   |
| 882 | 10.1016/j.metabol.2008.01.031    | √ |   |
| 883 | 10.1002/dmrr.2926                | √ |   |
| 884 | 10.1016/j.diabres.2009.02.002    | √ |   |
| 885 | 10.1016/j.resinv.2015.05.005     | √ |   |
| 886 | 10.1093/ckj/sfs176               | √ |   |
| 887 | 10.1159/000489691                | √ |   |
| 888 | 10.1007/s00198-010-1370-7.       | √ |   |
| 889 | 10.1016/j.scispo.2011.11.004     | √ |   |
| 890 | 0.1007/s00125-007-0699-8         | √ |   |
| 891 | 10.5717/jenb.2015.19.1.19        | √ |   |
| 892 | 10.22088/jbums.17.4.7            | √ |   |
| 893 | 10.1016/j.exger.2019.03.007      | √ |   |
| 894 | 10.1111/j.1464-5491.2009.02897.x | √ |   |
| 895 | 10.1016/j.neubiorev.2017.04.030  | √ |   |
| 896 | 10.1016/j.gene.2018.05.040       | √ |   |
| 897 | 10.1016/j.dsx.2019.01.040        | √ |   |
| 898 | 10.1242/jeb.163840               | √ |   |

|     |                                       |   |   |
|-----|---------------------------------------|---|---|
| 899 | 10.1186/1745-6215-15-431              | √ |   |
| 900 | 10.1158/1055-9965.EPI-17-0766         | √ |   |
| 901 | 10.1016/j.sbspro.2012.05.138          | √ |   |
| 902 | 10.1111/j.1365-2265.2006.02474.x      | √ |   |
| 903 | PMID: 24431310                        |   | √ |
| 904 | 10.1016/j.ddmod.2019.03.002           | √ |   |
| 905 | 10.1016/j.obmed.2016.12.002           | √ |   |
| 906 | 10.1016/j.hfc.2019.08.008             | √ |   |
| 907 | 10.1139/apnm-2014-0256                | √ |   |
| 908 | 10.1016/j.regpep.2011.11.004          |   | √ |
| 909 | 10.1016/j.smim.2018.09.003            | √ |   |
| 910 | 10.12968/hmed.2016.77.6.362           | √ |   |
| 911 | 10.1194/jlr.M800610-JLR200            | √ |   |
| 912 | 10.1016/j.cgh.2017.04.004             | √ |   |
| 913 | 10.1074/jbc.M103241200                | √ |   |
| 914 | 10.1016/j.juro.2014.12.086            | √ |   |
| 915 | 10.2337/dc06-0145                     | √ |   |
| 916 | 10.1016/j.mce.2008.07.002             | √ |   |
| 917 | 10.1016/j.atherosclerosis.2015.03.012 | √ |   |
| 918 | 10.1016/j.cyto.2012.02.005            | √ |   |
| 919 | 10.1007/s11033-008-9260-1             | √ |   |
| 920 | 10.1016/j.ekir.2017.01.009            | √ |   |
| 921 | 10.1016/j.jbspin.2018.12.005          | √ |   |
| 922 | 10.1002/lsm.22395                     | √ |   |
| 923 | 10.1016/j.regpep.2011.04.003          |   | √ |
| 924 | 10.1016/j.humimm.2015.10.008          | √ |   |
| 925 | 10.1016/j.ajp.2019.04.006             | √ |   |
| 926 | 10.1016/j.ijpp.2018.04.001            | √ |   |
| 927 | 10.1111/j.1748-1716.2005.01502.x      | √ |   |
| 928 | 10.2174/0929867325666180713154505     | √ |   |
| 929 | 10.1164/rccm.201603-0446OC            | √ |   |
| 930 | 10.1016/S0047-6374(01)00287-1         | √ |   |
| 931 | 10.1016/j.joca.2019.08.003            | √ |   |
| 932 | 10.1016/j.chemphyslip.2019.05.005     | √ |   |
| 933 | 10.1002/hep.27395                     | √ |   |
| 934 | 10.1016/j.niox.2019.02.006            | √ |   |
| 935 | 10.1073/pnas.0705408104               | √ |   |
| 936 | 10.1016/j.cmet.2017.02.006            | √ |   |
| 937 | 10.1016/j.cyto.2017.12.008            | √ |   |
| 938 | 10.1530/eje.0.1480293                 | √ |   |
| 939 | 10.1016/j.ocarto.2019.100019          | √ |   |
| 940 | 10.1016/j.trsl.2013.07.011            | √ |   |
| 941 | 10.1016/j.exger.2009.04.001           | √ |   |

|     |                                       |   |   |
|-----|---------------------------------------|---|---|
| 942 | 10.1016/j.jcyt.2017.07.002            | √ |   |
| 943 | 10.1002/mnfr.201300285                | √ |   |
| 944 | 10.1016/j.jnutbio.2011.04.001         | √ |   |
| 945 | 10.1016/j.ekir.2017.12.010            | √ |   |
| 946 | 10.1007/s00125-007-0867-x             | √ |   |
| 947 | 10.1002/jcsm.12129                    | √ |   |
| 948 | 10.1152/ajpendo.00169.2005            | √ |   |
| 949 | 10.1093/gerona/gls077                 |   | √ |
| 950 | 10.1016/j.clnu.2016.11.007            | √ |   |
| 951 | 10.1016/j.arr.2018.07.004             | √ |   |
| 952 | 10.1530/JOE-16-0363                   | √ |   |
| 953 | 10.1016/j.bbrc.2005.09.044            | √ |   |
| 954 | 10.3390/ijms151120022                 | √ |   |
| 955 | 10.1016/S2213-8587(15)00283-1         | √ |   |
| 956 | 10.1016/j.metabol.2009.08.020         | √ |   |
| 957 | 10.1016/j.archger.2019.03.021         | √ |   |
| 958 | 10.1016/j.ejrad.2016.04.005           | √ |   |
| 959 | 0.1152/physiolgenomics.00226.2007     | √ |   |
| 960 | 10.1016/j.bone.2014.03.008            | √ |   |
| 961 | 10.1038/ijo.2008.141                  | √ |   |
| 962 | 10.1016/j.ijcard.2016.04.036          | √ |   |
| 963 | 10.1093/ndt/gfl552                    | √ |   |
| 964 | 10.1016/j.bcp.2019.08.023             | √ |   |
| 965 | 10.1016/j.cca.2018.05.046             | √ |   |
| 966 | 10.14814/phy2.12556                   | √ |   |
| 967 | 10.1016/j.rmed.2017.08.007            | √ |   |
| 968 | 10.1016/j.jim.2010.09.012             | √ |   |
| 969 | 10.1016/j.sjbs.2017.11.008            | √ |   |
| 970 | 10.1152/ajpheart.00394.2012           | √ |   |
| 971 | 10.1016/j.atherosclerosis.2008.11.007 |   | √ |
| 972 | 10.1089/met.2008.0035                 | √ |   |
| 973 | 10.1016/j.diabres.2011.12.014         | √ |   |
| 974 | 10.3945/jn.109.119388                 | √ |   |
| 975 | 10.1152/japplphysiol.00862            | √ |   |
| 976 | 10.1016/j.clnu.2006.02.008            | √ |   |
| 977 | 0.1016/j.arr.2013.11.002              | √ |   |
| 978 | 10.1016/j.cell.2013.12.012            | √ |   |
| 979 | 10.14814/phy2.14062                   | √ |   |
| 980 | 10.1016/j.semnephrol.2008.10.002      | √ |   |
| 981 | 10.1016/j.bbrc.2019.06.141            | √ |   |
| 982 | 10.1039/c8fo00898a                    | √ |   |
